# Supplementary material
Source: PubMed Central journal article supplement (PMC3879686)
Supplement: NIHMS539944-supplement-1.pdf [file NIHMS539944-supplement-1.pdf]

**Recapitulation of Pancreatic Neuroendocrine Tumors in Human Multiple  
Endocrine Neoplasia Type I (MEN1) Syndrome via Pdx1-directed Inactivation  
of Men1**

H.-C. Jennifer Shen, Mei He, Anatheia Powell, Asha Adem, Dominique Lorang,  
Charles Heller, Amelia C. Grover, Kris Ylaya, Stephen M. Hewitt, Stephen J. Marx,  
Allen M. Spiegel, Steven K. Libutti

**Supplementary Data**

### **Supplementary Data A**

H&E staining of representative control Pdx1-Cre, Men1 f/f pancreas and mutant Pdx1-Cre;Men1 f/f pancreas at 2-3 months (mo) of age. Pancreatic exocrine tissues are as indicated, and islets in control and mutant animals are indicated by arrows. Images are shown at both 100x and 200x

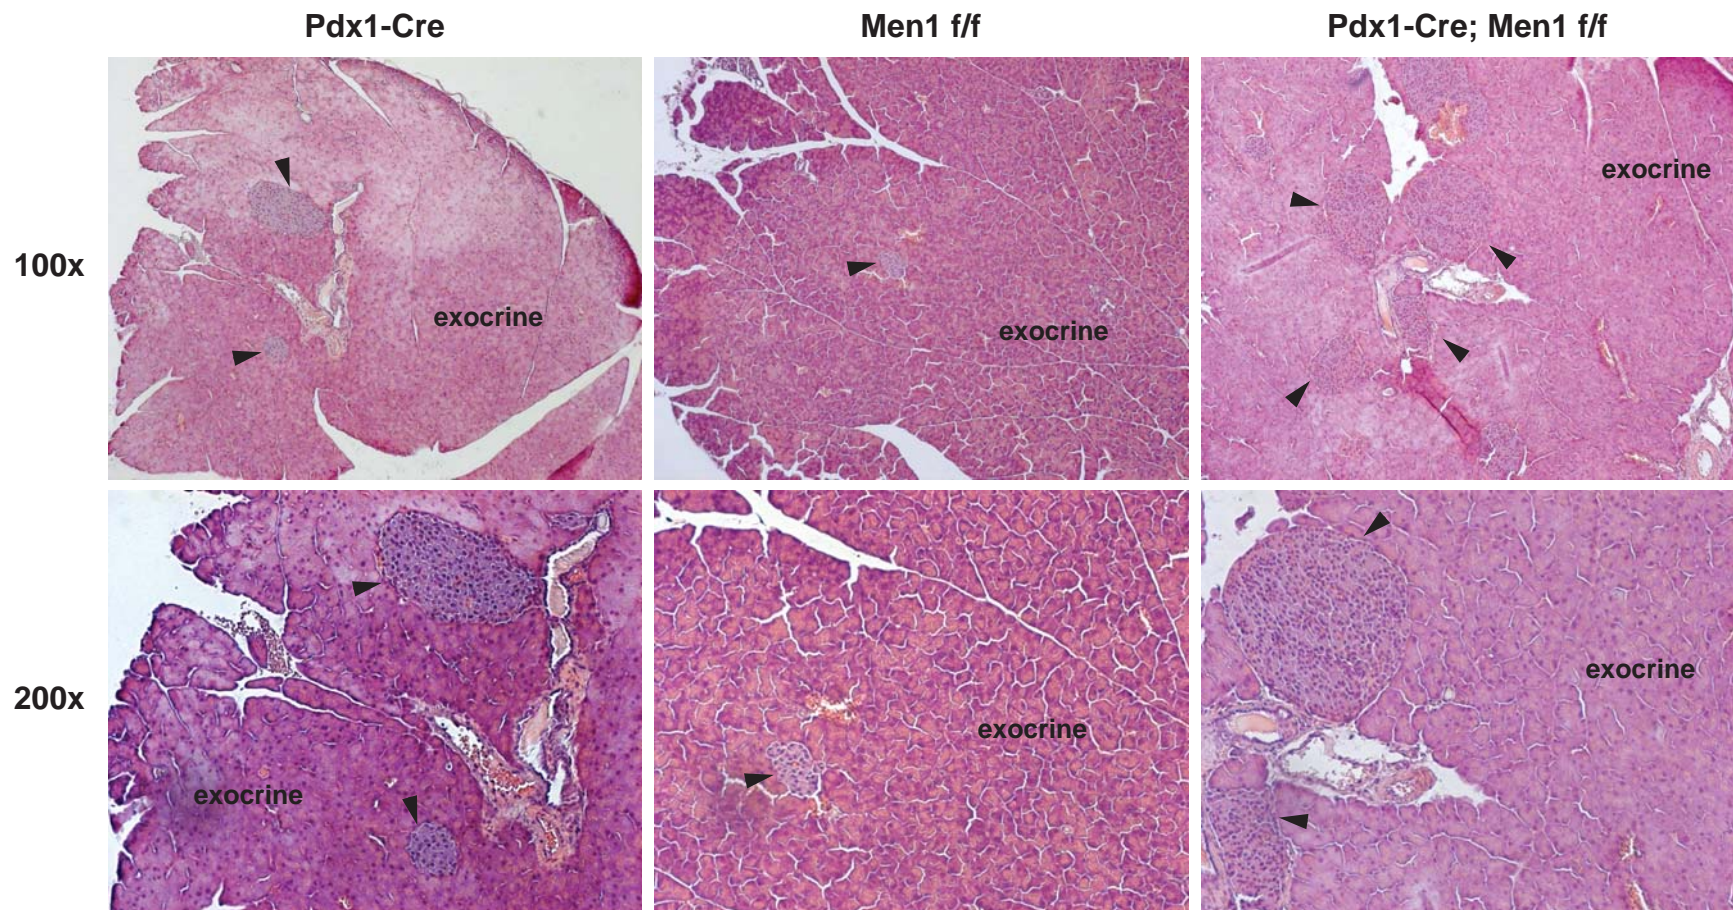

### **Supplementary Data B**

Immuno-fluorescent staining for cell nuclei (DAPI, blue), insulin (red) and Ki-67 (green) of representative control Men1 f/+ and mutant Pdx1-Cre;Men1 f/f islets of 2-3 month old mice. Two representative images for each genotype are shown at 100x.

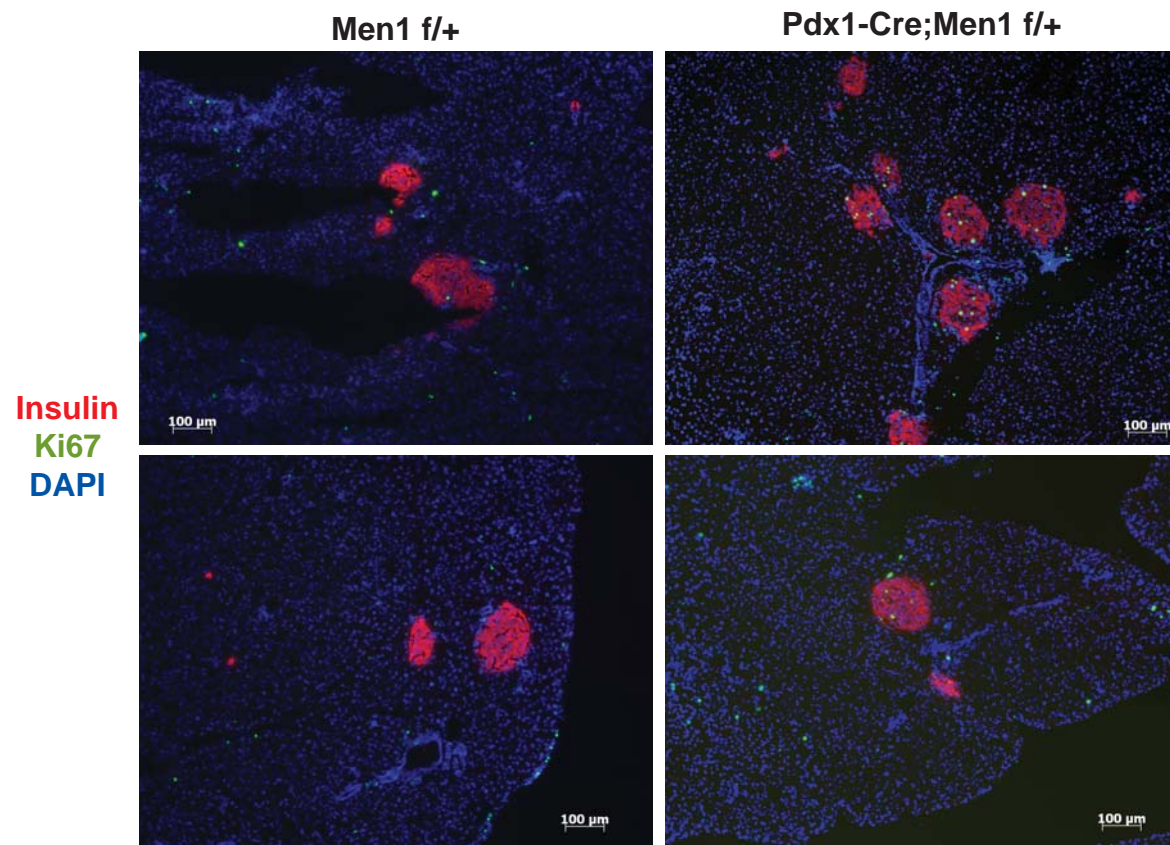

Supplementary Data C

Fasted plasma glucose levels in mice of indicated genotype.

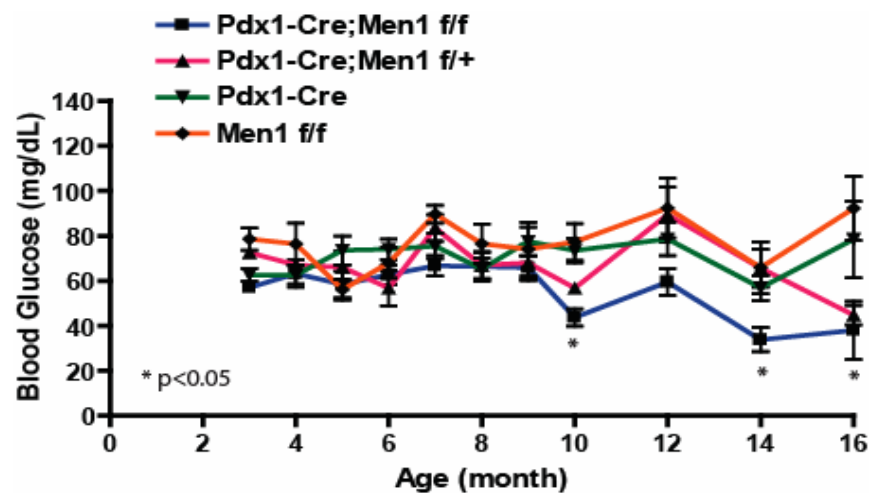

Number of animals represented in graph

| Age (month)       | 3  | 4  | 5  | 6  | 7  | 8  | 9  | 10     | 12     | 14     | 16     |
|-------------------|----|----|----|----|----|----|----|--------|--------|--------|--------|
| Pdx1-Cre;Men1 f/f | 9  | 9  | 11 | 10 | 13 | 11 | 9  | 6      | 9      | 6      | 4      |
| Pdx1-Cre;Men1 f/+ | 8  | 10 | 7  | 5  | 8  | 7  | 6  | 4      | 8      | 5      | 5      |
| Pdx1-Cre          | 9  | 10 | 9  | 9  | 10 | 9  | 9  | 5      | 9      | 6      | 5      |
| Men1 f/f          | 5  | 6  | 8  | 7  | 8  | 7  | 5  | 3      | 6      | 6      | 5      |
| Total             | 31 | 35 | 35 | 31 | 41 | 34 | 29 | 18     | 32     | 23     | 19     |
| p-values          | NS | 0.0006 | 0.0832 | 0.0358 | 0.0306 |

NS: not significant by one-way ANOVA analysis

### **Supplementary Data D**

Representative immuno-fluorescent images of pancreatic exocrine tissues from control Pdx1-Cre, wildtype mice, and mutant Pdx1-Cre;Men1 f/f mice at 12 months of age.

Blood vessels are visualized via FITC-lectin injection (green) while pancreatic islets are identified using an anti-insulin antibody (red, arrows). Pancreatic exocrine tissues are as indicated, and the extensive islet tumors in Pdx1-Cre;Men1 f/f are outlined in the far right panels.

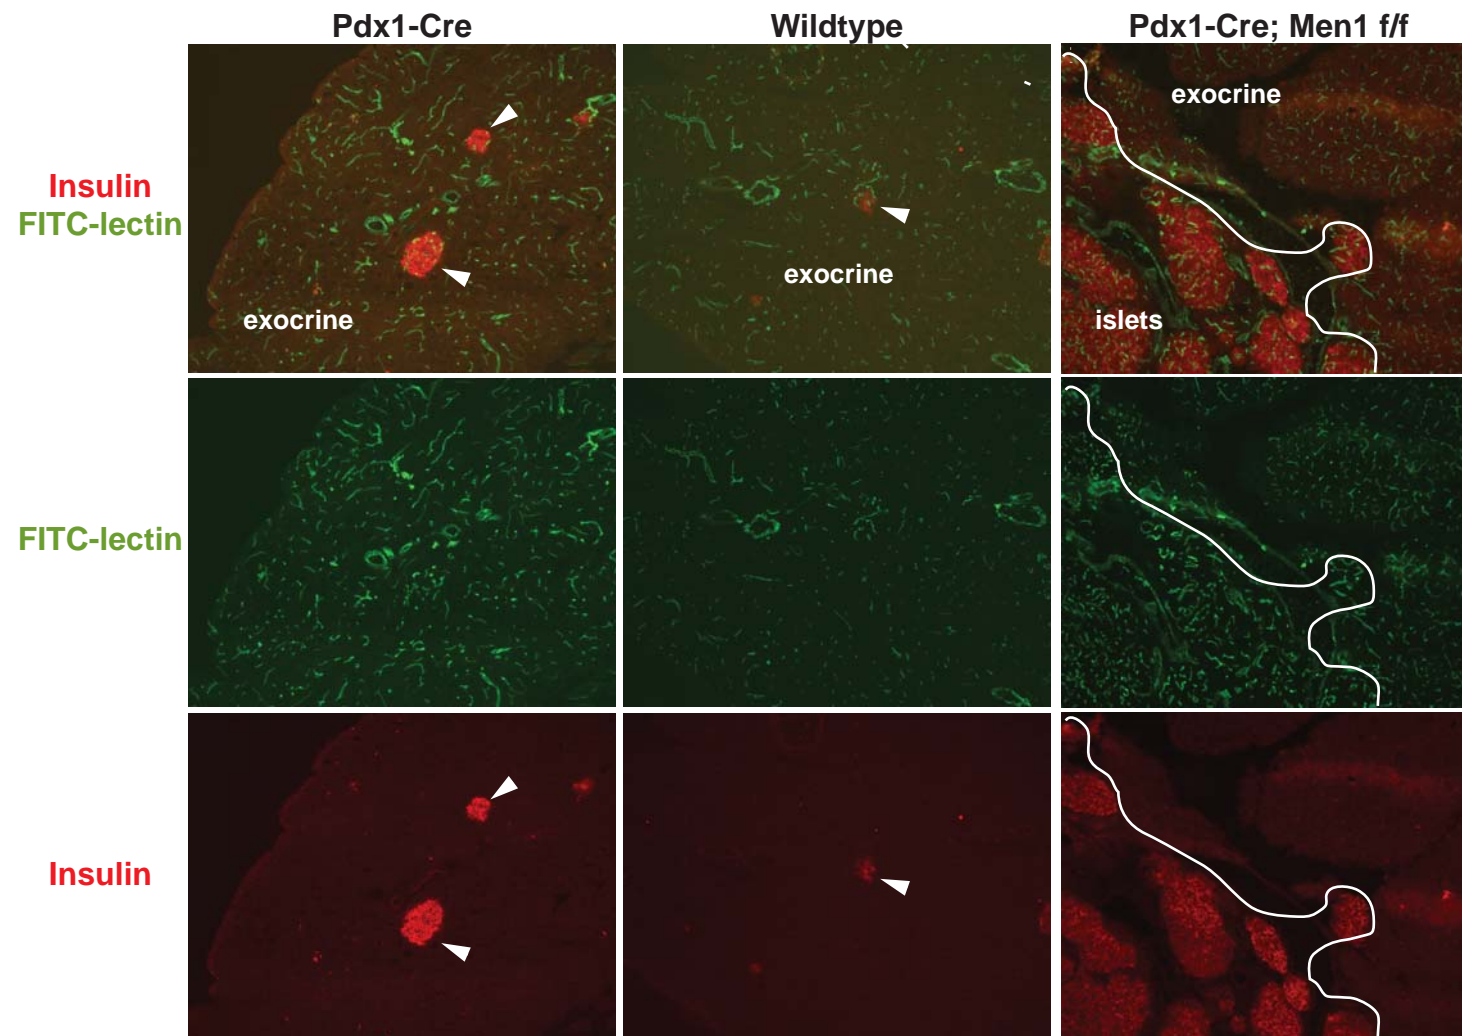

### Supplementary Data E

Pancreatic VEGF protein expression in vehicle or sunitinib treated (trx) animals of control Men1 f/f and mutant Pdx1-Cre;Men1 f/f genotypes. Each bar represents the average of multiple animals (n, as shown in supplementary data – Table 2) for each genotypes.

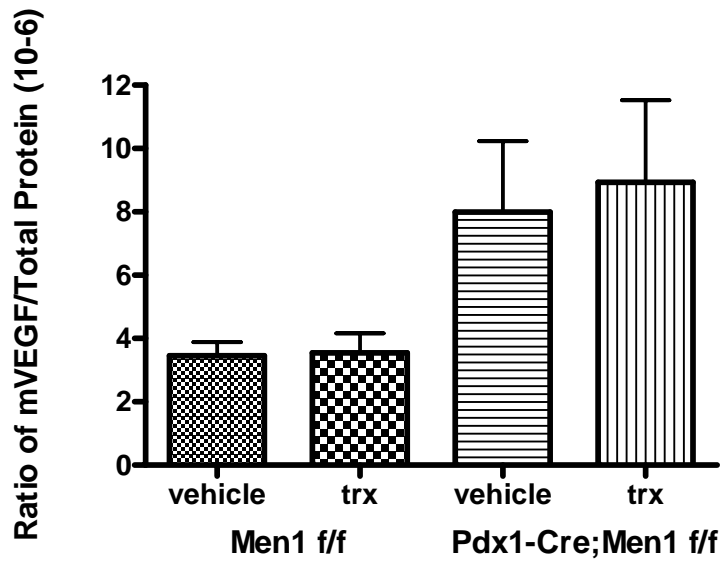

## Supplementary Data - Tables

Table 1 - Genotype ratio from Pdx1-Cre;Men1 f/+ mice breeding with each other.

|                     | <b>Men1 +/+</b> | <b>Men1 f/+</b> | <b>Men1 f/f</b> |     |
|---------------------|-----------------|-----------------|-----------------|-----|
| Mendelian %         | 25.0%           | 50.0%           | 25.0%           | N   |
| <b>Pdx1-Cre</b>     | 26.4%           | 52.7%           | 20.9%           | 110 |
| <b>Cre Negative</b> | 30.8%           | 44.2%           | 25.0%           | 52  |

Table 2 – Numbers (#) of animals utilized in sunitinib treatment study, and subsequent images of pancreas analyzed for these animals.

| Mouse Genotype           |                  | # of mice | # of images |
|--------------------------|------------------|-----------|-------------|
| <b>Men1 f/f</b>          | <b>vehicle</b>   | 4         | 14          |
|                          | <b>sunitinib</b> | 4         | 15          |
| <b>Pdx1-Cre;Men1 f/f</b> | <b>vehicle</b>   | 6         | 35          |
|                          | <b>sunitinib</b> | 8         | 40          |
